# Supplementary material for: A Redox-Probe-Free Immunosensor Based on Electrocatalytic Prussian Blue Nanostructured Film One-Step-Prepared for Zika Virus Diagnosis
Source: MDPI journal article supplement (doi:10.3390/bios12080623), 2022-08-10
Supplement: s1 [file s1]

## Supplementary Information

### A redox-probe free immunosensor based on electrocatalytic Prussian blue nanostructured film one-step prepared for Zika Virus diagnostic

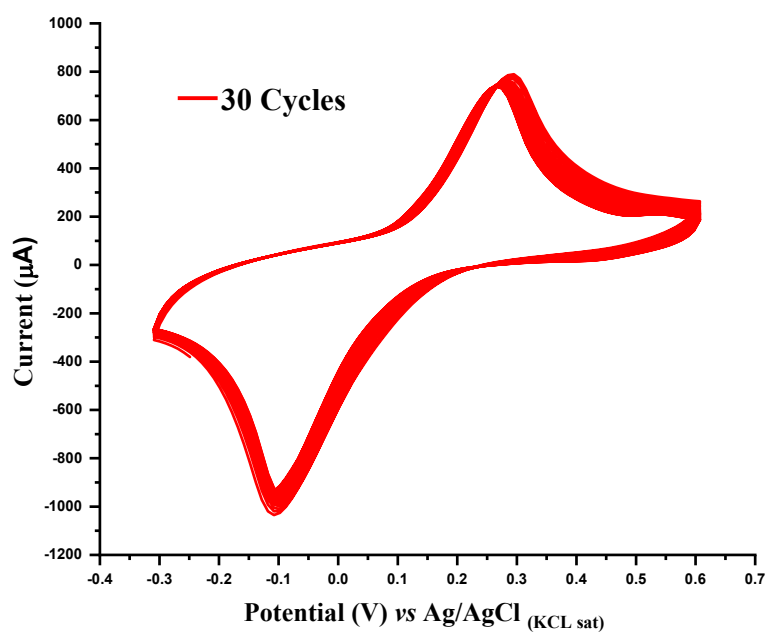

**Figure S1.** Cyclic voltammograms of the CHI-CNT@PB nanocomposite film. The 30 cyclic voltammograms were performed in the presence of KCl (10 mmol.L<sup>-1</sup>) at a 0.05 V s<sup>-1</sup> scan rate.

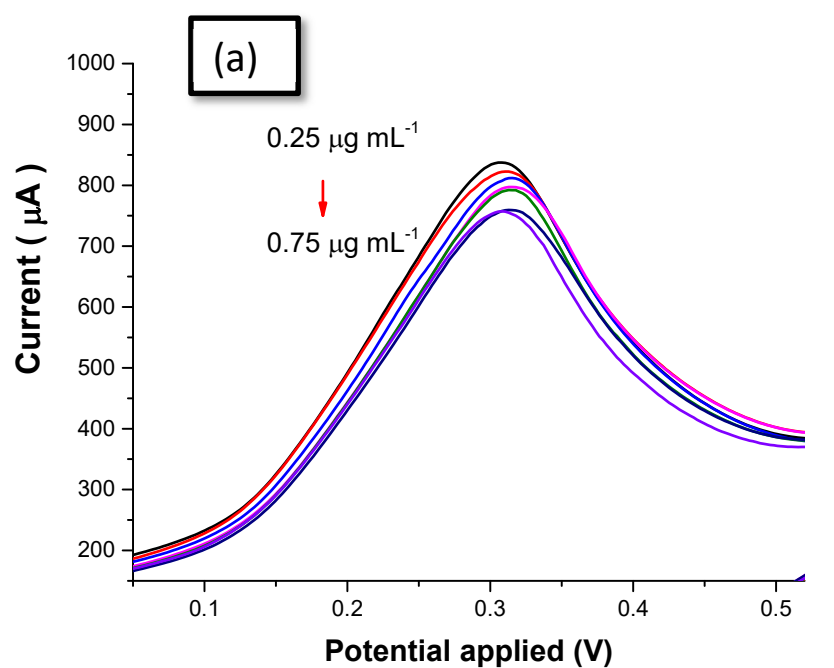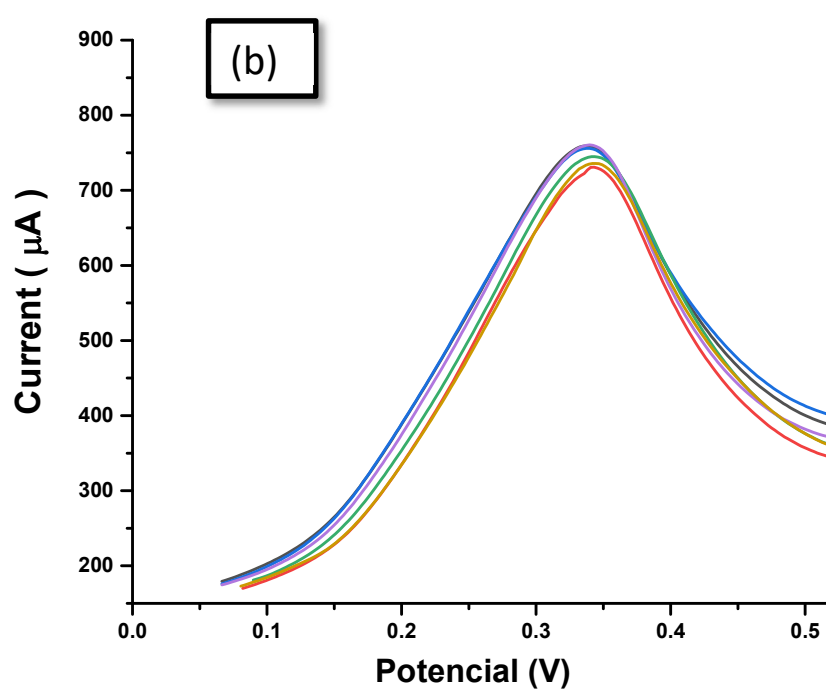

**Figure S2.** Anodic peaks of the CV by immunosensor response to the (a) Spiked pool of serum sample with ZIKV E protein and, (b) Unspiked pool of serum sample with ZIKV E protein.
